# Supplementary material for: Generation of Organized Porcine Testicular Organoids in Solubilized Hydrogels from Decellularized Extracellular Matrix
Source: PubMed Central journal article supplement (PMC6862040; doi:10.3390/ijms20215476), 2019-11-03
Supplement: ijms-20-05476-s001.pdf [file ijms-20-05476-s001.pdf]

## Supplemental Data

**Table S1.** List of ECM proteins identified by 2D-LC-MS in tECM and collagen preparation. Proteins are classified alphabetically and different colors were used to categorize them: green = collagens, orange = ECM-glycoproteins, yellow = proteoglycans, blue = other ECM-affiliated proteins and grey = non ECM-affiliated proteins. \*accession numbers = F1SGG3\* and F1RGX4\*\*. Sum posterior error probability (PEP) score = protein score calculated as the negative logarithms of the PEP values of the connected peptide spectrum matches (PSMs).

| Protein name                                              | Sum PEP score |          | Protein name                               | Sum PEP score |          |
|-----------------------------------------------------------|---------------|----------|--------------------------------------------|---------------|----------|
|                                                           | tECM          | Collagen |                                            | tECM          | Collagen |
|                                                           | M             | en       |                                            | M             | en       |
| Aggrecan core protein                                     | 10.3          | /        | Fibulin 5                                  | 3.6           | /        |
| Actinin alpha 4                                           | 6.3           | 2.5      | Fibulin-1                                  | 5.2           | /        |
| ADAM metalloproteinase with thrombospondin type 1 motif 2 | 2.7           | /        | Galectin                                   | 1.8           | 3.2      |
| ADAMTS like 4                                             | 1.6           | /        | Galectin                                   | 5.3           | /        |
| Agrin                                                     | 35.9          | /        | Galectin                                   | 17.1          | /        |
| Apolipoprotein A-I                                        | 33.2          | 5.5      | Heat shock protein HSP 90-alpha            | 5.5           | 2.1      |
| Asporin                                                   | 6.2           | /        | Hemoglobin subunit beta                    | 17.0          | 5.6      |
| ATP synthase subunit beta                                 | 56.8          | 5.0      | Heparan sulfate proteoglycan 2             | 248.7         | /        |
| Biglycan                                                  | 8.7           | /        | Histone H2B                                | 17.8          | 5.2      |
| Clathrin heavy chain                                      | 28.0          | 3.5      | Histone H4                                 | 54.7          | 7.4      |
| Collagen alpha-1(III) chain precursor                     | 30.6          | 62.3     | Hyaluronan and proteoglycan link protein 1 | 30.0          | /        |
| Collagen alpha-1(V) chain precursor                       | 5.7           | 24.5     | Junction plakoglobin                       | 10.0          | 5.1      |
| Collagen alpha-1(X) chain precursor                       | 2.3           | /        | Keratin 10                                 | 18.1          | 5.6      |
| Collagen alpha-2(I) chain precursor                       | 128.5         | 665.9    | Keratin 14                                 | 26.4          | 2.3      |
| Collagen alpha-2(V) chain precursor                       | 2.3           | 19.9     | Keratin 5                                  | 24.0          | 6.7      |
| Collagen alpha-3(V) chain precursor                       | 3.7           | /        | Keratin 75                                 | 11.2          | 8.7      |
| Collagen type I alpha 1 chain                             | 94.0          | 849.8    | Keratin, type II cytoskeletal 2 epidermal  | 12.0          | 6.4      |
| Collagen type II alpha 1 chain                            | 7.1           | 67.6     | Laminin subunit alpha 1                    | 50.4          | /        |
| Collagen type IV alpha 2 chain                            | 44.6          | /        | Laminin subunit alpha 2                    | 35.5          | /        |
| Collagen type IV alpha 5 chain                            | 12.6          | /        | Laminin subunit alpha 3                    | 10.5          | /        |
| Collagen type VI alpha 2 chain                            | 12.3          | /        | Laminin subunit alpha 4                    | 13.1          | /        |
| Collagen type VI alpha 3 chain                            | 196.8         | 31.8     | Laminin subunit alpha 5                    | 91.9          | /        |
| Collagen type VI alpha 3 chain                            | 159.2         | /        | Laminin subunit beta 1                     | 32.7          | /        |
| Collagen type VI alpha 6 chain                            | 4.9           | /        | Laminin subunit beta 2                     | 47.6          | /        |
| Collagen type VII alpha 1 chain                           | 2.7           | /        | Laminin subunit gamma 2                    | 2.1           | /        |

|                                                                             |       |      |                                                           |      |      |
|-----------------------------------------------------------------------------|-------|------|-----------------------------------------------------------|------|------|
| Collagen type XII alpha 1 chain                                             | 138.8 | 9.9  | Laminin subunit gamma 3                                   | 2.3  | /    |
| Collagen type XIV alpha 1 chain                                             | 64.0  | 15.0 | Laminin subunit gamma-1 precursor                         | 56.7 | 2.3  |
| Collagen type XIV alpha 1 chain                                             | 2.1   | /    | Lumican precursor                                         | 20.4 | /    |
| Collagen type XV alpha 1 chain                                              | 25.3  | /    | Matrilin 2                                                | 37.8 | /    |
| Collagen type XVIII alpha 1 chain                                           | 15.6  | /    | Matrix metalloproteinase-9 precursor                      | 1.9  | /    |
| Collagen type XXVII alpha 1 chain                                           | 6.0   | /    | Multimerin 1                                              | 3.7  | /    |
| Cytochrome c                                                                | 16.0  | 14.6 | Multimerin 2                                              | 21.9 | /    |
| D-3-phosphoglycerate dehydrogenase                                          | 12.9  | 6.7  | Myosin heavy chain 14                                     | 63.5 | 2.6  |
| Decorin                                                                     | 10.7  | /    | Myosin light chain 1/3, skeletal muscle isoform           | 10.2 | 2.4  |
| Dermatopontin                                                               | 3.3   | /    | Nidogen 1                                                 | 27.4 | /    |
| Dolichyl-diphosphooligosaccharide-protein glycosyltransferase subunit STT3A | 32.1  | 2.3  | Nidogen 2                                                 | 19.9 | /    |
| Dystroglycan                                                                | 1.5   | /    | Periostin isoform 1 precursor                             | 15.6 | /    |
| Elastin microfibril interfacier 1                                           | 42.5  | /    | Peroxidasin                                               | 6.4  | /    |
| Elastin microfibril interfacier 2                                           | 1.5   | /    | Prelamin-A/C                                              | 45.7 | 10.4 |
| Elastin precursor                                                           | 15.9  | /    | Proline and arginine rich end leucine rich repeat protein | 23.9 | /    |
| Extracellular matrix protein 1                                              | 3.9   | /    | Serpin H1 precursor                                       | 43.1 | 2.1  |
| Extracellular matrix protein 2                                              | 5.7   | /    | Serum albumin                                             | 28.5 | 9.4  |
| Fast skeletal muscle troponin C                                             | 4.1   | 2.4  | Tenascin                                                  | 33.9 | /    |
| Fibrillin 2                                                                 | 117.9 | /    | Tenascin-X precursor                                      | 62.8 | /    |
| Fibrillin 3                                                                 | 32.7  | /    | Tropomyosin alpha-1 chain                                 | 15.0 | 10.2 |
| Fibrillin-1                                                                 | 207.1 | /    | Tropomyosin alpha-3 chain                                 | 7.9  | 6.5  |
| Fibromodulin                                                                | 5.3   | /    | Trypsinogen precursor                                     | 34.9 | 19.6 |
| Fibronectin 1                                                               | 235.0 | /    | Tubulin beta chain                                        | 24.2 | 2.1  |
| Fibronectin 1                                                               | 229.8 | /    | Uncharacterized protein*                                  | 29.7 | 9.7  |
| Fibronectin type III domain containing 3A                                   | 10.4  | /    | Uncharacterized protein**                                 | 10.6 | 2.3  |
| Fibronectin type III domain containing 3B                                   | 15.7  | /    | Vimentin                                                  | 56.0 | 22.4 |
| Fibulin 2                                                                   | 7.5   | /    | Vitronectin                                               | 5.7  | /    |

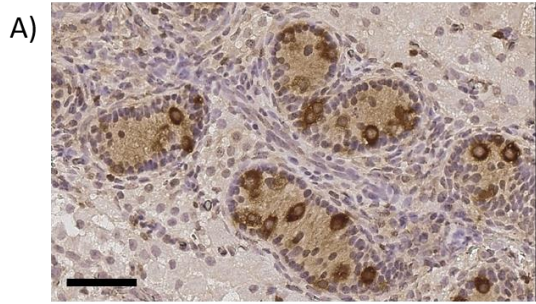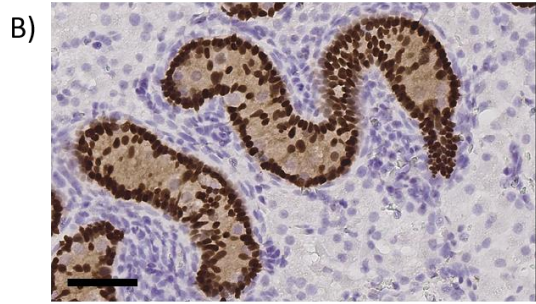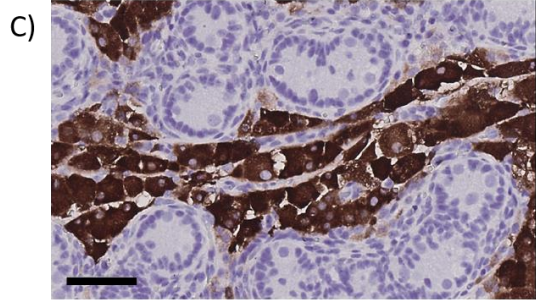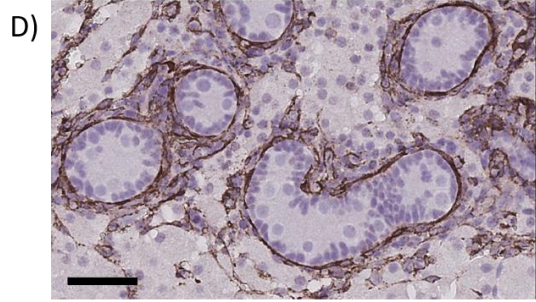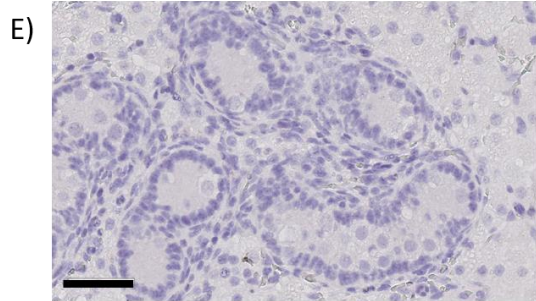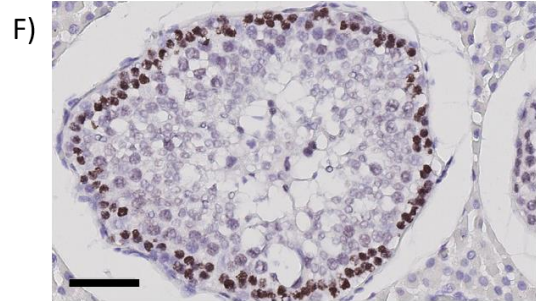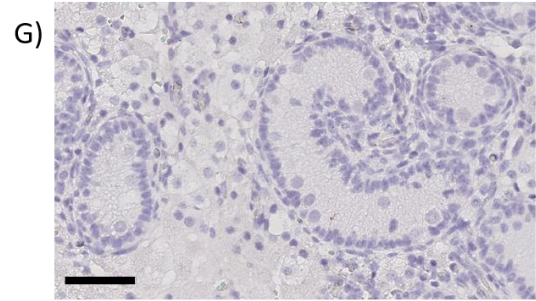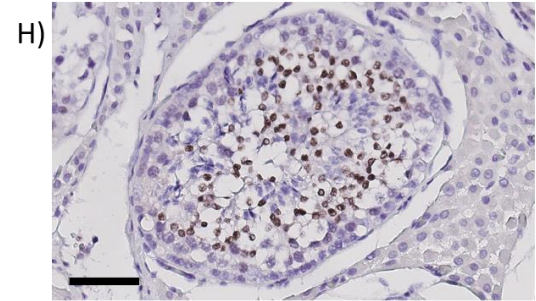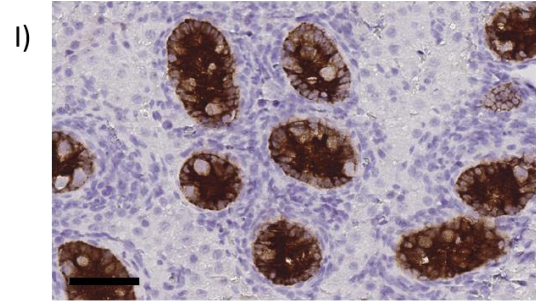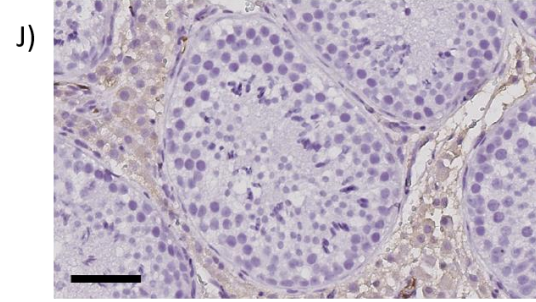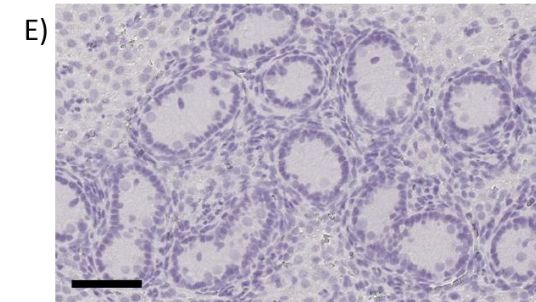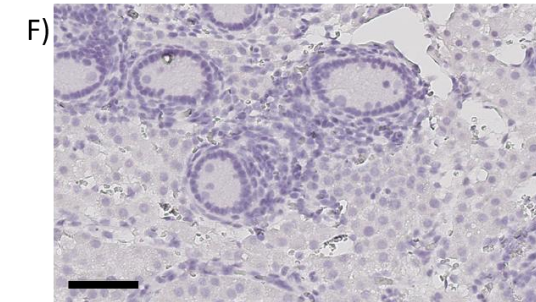

**Figure S1.** IHC controls. Porcine ITT recovered from pigs aged between 4 and 7 days old was used as positive control for DDX4 (A), SOX9 (B), CYP19A1 (C) and ACTA2 (D) immunostainings. Positive staining for SCP3 and CREM were detected in mature (6 months old) porcine testicular tissue (F-H) but not in ITT (E-G). The expression of AMH was detected in STs of porcine ITT (I) but not in mature testicular tissue (J). Pictures E and F represent negative controls (without primary antibodies) with anti-mouse (E) and anti-rabbit (F) secondary antibodies. Scale bars = 50  $\mu$ m.
